# Supplementary material for: Genetic Analysis of T Cell Lymphomas in Carbon Ion-Irradiated Mice Reveals Frequent Interstitial Chromosome Deletions: Implications for Second Cancer Induction in Normal Tissues during Carbon Ion Radiotherapy
Source: PubMed Central journal article supplement (PMC4488329; doi:10.1371/journal.pone.0130666), 2015-06-30
Supplement: pone.0130666.s011.pdf [file pone.0130666.s011.pdf]

**S1 Table. TL Incidence and Characteristics of Tumours Included in the Study**

| <b>Group</b>         | <b>Crude TL Incidence (%)</b> | <b>No Tumours Analysed (No Male)</b> | <b>Body Weight at necropsy (g)<br/><i>mean ± SEM</i></b> | <b>Thymus Weight at necropsy (mg)<br/><i>mean ± SEM</i></b> | <b>Spleen Weight at necropsy (mg)<br/><i>mean ± SEM</i></b> | <b>Lifespan (days)<br/><i>mean ± SD</i></b> | <b>Lifespan (days)<br/><i>min – max</i></b> |
|----------------------|-------------------------------|--------------------------------------|----------------------------------------------------------|-------------------------------------------------------------|-------------------------------------------------------------|---------------------------------------------|---------------------------------------------|
| Gamma<br>1 × 4 Gy    | 16/98 (16.3)                  | 16 (8)                               | 26.5 ± 1.5                                               | 559 ± 58                                                    | 386 ± 74                                                    | 221 ± 77                                    | 106 – 378                                   |
| Carbon<br>1 × 4 Gy   | 27/82 (32.9)                  | 20 (11)                              | 26.2 ± 1.0                                               | 557 ± 52                                                    | 302 ± 47                                                    | 195 ± 96                                    | 111 – 444                                   |
| Carbon<br>1 × 4.8 Gy | 34/88 (38.6)                  | 28 (12)                              | 24.4 ± 0.6                                               | 497 ± 44                                                    | 296 ± 43                                                    | 177 ± 79                                    | 88 – 514                                    |
| Carbon<br>4 × 1 Gy   | 16/80 (20)                    | 15 (7)                               | 30.3 ± 1.1                                               | 486 ± 60                                                    | 341 ± 45                                                    | 222 ± 83                                    | 149 – 444                                   |
| Carbon<br>4 × 1.2 Gy | 43/80 (53.8)                  | 38 (18)                              | 27.7 ± 0.5                                               | 514 ± 37                                                    | 423 ± 40                                                    | 207 ± 66                                    | 140 – 445                                   |
