# Supplementary material for: Genetic Analysis of T Cell Lymphomas in Carbon Ion-Irradiated Mice Reveals Frequent Interstitial Chromosome Deletions: Implications for Second Cancer Induction in Normal Tissues during Carbon Ion Radiotherapy
Source: PubMed Central journal article supplement (PMC4488329; doi:10.1371/journal.pone.0130666), 2015-06-30
Supplement: pone.0130666.s012.pdf [file pone.0130666.s012.pdf]

**S2 Table. Distribution of Thymus and Spleen Mass for Tumours Included in the Study**

| Group                | No Tumours<br>Analysed<br>(No. Male) | Thymus > 300 mg<br>Spleen > 200 mg | Thymus > 300 mg<br>Spleen < 200 mg | Thymus < 300 mg<br>Spleen > 200 mg | Thymus < 300 mg<br>Spleen < 200 mg |
|----------------------|--------------------------------------|------------------------------------|------------------------------------|------------------------------------|------------------------------------|
|                      |                                      | No Tumours (% of Group Total)      |                                    |                                    |                                    |
| Gamma<br>1 × 4 Gy    | 16 (8)                               | 8 (50%)                            | 5 (31%)                            | 3 (19%)                            | 0 (0%)                             |
| Carbon<br>1 × 4 Gy   | 20 (11)                              | 10 (50%)                           | 9 (45%)                            | 1 (5%)                             | 0 (0%)                             |
| Carbon<br>1 × 4.8 Gy | 28 (12)                              | 13 (46%)                           | 11 (39%)                           | 3 (11%)                            | 1 (4%)                             |
| Carbon<br>4 × 1 Gy   | 15 (7)                               | 11 (73%)                           | 3 (20%)                            | 0 (0%)                             | 1 (7%)                             |
| Carbon<br>4 × 1.2 Gy | 38 (18)                              | 21 (55%)                           | 10 (26%)                           | 7 (18%)                            | 0 (0%)                             |
