# Supplementary material for: Genetic Analysis of T Cell Lymphomas in Carbon Ion-Irradiated Mice Reveals Frequent Interstitial Chromosome Deletions: Implications for Second Cancer Induction in Normal Tissues during Carbon Ion Radiotherapy
Source: PubMed Central journal article supplement (PMC4488329; doi:10.1371/journal.pone.0130666), 2015-06-30
Supplement: pone.0130666.s013.pdf [file pone.0130666.s013.pdf]

**S3 Table. Distribution of Immunophenotypes between Carbon Ion Treatment Groups**

| Group                                     | CD4+<br>CD8+ | CD4-<br>CD8- | CD4+<br>CD8- | CD4-<br>CD8+ | CD4+<br>CD8+/- | CD4+/-<br>CD8+ | CD4+/-<br>CD8+/- | Mixed |
|-------------------------------------------|--------------|--------------|--------------|--------------|----------------|----------------|------------------|-------|
| <i>No Tumours of Each Immunophenotype</i> |              |              |              |              |                |                |                  |       |
| Carbon<br>1 × 4 Gy                        | 5            | -            | 2            | -            | -              | -              | 1                | -     |
| Carbon<br>1 × 4.8 Gy                      | 2            | 1            | 1            | -            | -              | 1              | 2                | 1     |
| Carbon<br>4 × 1 Gy                        | 1            | -            | -            | -            | -              | 2              | 1                | -     |
| Carbon<br>4 × 1.2 Gy                      | 3            | 1            | 2            | 1            | 2              | 2              | 2                | 2     |
