# Supplementary material for: Genetic Analysis of T Cell Lymphomas in Carbon Ion-Irradiated Mice Reveals Frequent Interstitial Chromosome Deletions: Implications for Second Cancer Induction in Normal Tissues during Carbon Ion Radiotherapy
Source: PubMed Central journal article supplement (PMC4488329; doi:10.1371/journal.pone.0130666), 2015-06-30
Supplement: pone.0130666.s014.pdf [file pone.0130666.s014.pdf]

**S4 Table. Details of Sub-Cohort of TL for Array-based CGH Analysis**

| Tumour IDs                                      | No Tumours | Sex    | Radiation  | Total Dose | No Fractions | Dose per Fraction | Age at First Irradiation |
|-------------------------------------------------|------------|--------|------------|------------|--------------|-------------------|--------------------------|
| 22717, 23362, 23500                             | 3          | Female | Carbon Ion | 4.8 Gy     | 4            | 1.2 Gy            | 1 week                   |
| 23364, 23291, 23741                             | 3          | Male   | Carbon Ion | 4.8 Gy     | 4            | 1.2 Gy            | 1 week                   |
| 22490, 22708, 22570                             | 3          | Female | Carbon Ion | 4 Gy       | 4            | 1.0 Gy            | 1 week                   |
| 22705, 22544, 23476                             | 3          | Male   | Carbon Ion | 4 Gy       | 4            | 1.0 Gy            | 1 week                   |
| 22767, 23584                                    | 2          | Female | Carbon Ion | 4.8 Gy     | 1            | 4.8 Gy            | 1 week                   |
| 23721, 22578                                    | 2          | Male   | Carbon Ion | 4.8 Gy     | 1            | 4.8 Gy            | 1 week                   |
| 22533, 23265                                    | 2          | Female | Carbon Ion | 4 Gy       | 1            | 4 Gy              | 1 week                   |
| 23473, 22803                                    | 2          | Male   | Carbon Ion | 4 Gy       | 1            | 4 Gy              | 1 week                   |
| 11478, 12118, 10691, 11498, 11534, 11697, 12077 | 7          | Female | Gamma Ray  | 4 Gy       | 1            | 4 Gy              | 1 week                   |
| 10976, 11360, 10910, 10989, 11463               | 5          | Male   | Gamma Ray  | 4 Gy       | 1            | 4 Gy              | 1 week                   |
