# Supplementary material for: Genetic Analysis of T Cell Lymphomas in Carbon Ion-Irradiated Mice Reveals Frequent Interstitial Chromosome Deletions: Implications for Second Cancer Induction in Normal Tissues during Carbon Ion Radiotherapy
Source: PubMed Central journal article supplement (PMC4488329; doi:10.1371/journal.pone.0130666), 2015-06-30
Supplement: pone.0130666.s015.pdf [file pone.0130666.s015.pdf]

**S5 Table. Summary of *Notch1* PEST Domain Sequence Mutations**

| Mutation Class        | Location <sup>a</sup> | Alteration         | Predicted Protein Change | № Tumours (if >1) |
|-----------------------|-----------------------|--------------------|--------------------------|-------------------|
| <b>Deletion</b>       | +6951                 | del 'G'            | Frameshift               |                   |
|                       | +7002-7027            | del 26 bp          | Frameshift               |                   |
|                       | +7053                 | del 11 bp          | Frameshift               |                   |
|                       | +7080-7081            | del 'AC'           | Frameshift               |                   |
|                       | +7082                 | GGCTGGCA>TTGCTG G' | Frameshift               |                   |
|                       | +7082                 | del CGG ins GC     | Frameshift               |                   |
|                       | +7273-7280            | del 'AGTCTGC'      | Frameshift               |                   |
|                       | +7454-7470            | del 17 bp          | Frameshift               | 2                 |
|                       | +7455-7462            | del 'CCTCACCC'     | Frameshift               |                   |
|                       | +7469-7470            | del 2 bp           | Frameshift               |                   |
| +7466-7566            | del 100 bp            | Frameshift         |                          |                   |
| <b>Point-Mutation</b> | +6913                 | C>T                | Nonsense: Q2305*         |                   |
|                       | +7144                 | C>T                | Nonsense: Q2382*         |                   |
|                       | +7171                 | C>T                | Nonsense: Q2391*         |                   |
|                       | +7243                 | C>T                | Nonsense: Q2415*         |                   |
|                       | +7429                 | C>T                | Nonsense: Q2477*         |                   |
|                       | +7435                 | C>T                | Nonsense: Q2479*         |                   |
| <b>Insertion</b>      | +6847                 | G5>G6              | Frameshift               | 4                 |
|                       | +6926                 | ins 'T'            | Frameshift               |                   |
|                       | +6984                 | ins 'A'            | Frameshift               |                   |
|                       | +7020                 | ins 'T'            | Frameshift               |                   |
|                       | +7052                 | C4>C5              | Frameshift               |                   |
|                       | +7052                 | 'C'>'GGTGT'        | Frameshift               |                   |
|                       | +7056                 | ins 'AACC'         | Frameshift               |                   |
|                       | +7080                 | ins 'AGAC'         | Frameshift               |                   |
|                       | +7081                 | 'C'>'GA'           | Frameshift               |                   |
|                       | +7081                 | ins 'C'            | Frameshift               | 2                 |
|                       | +7081                 | ins 'TTTTT'        | Frameshift               |                   |
|                       | +7081                 | ins 'CCCC'         | Frameshift               |                   |
|                       | +7081                 | 'G'>'CC"           | Frameshift               | 2                 |
|                       | +7081                 | 'G'>'CCCCCCTC'     | Frameshift               |                   |
|                       | +7082                 | 'G'>'CC'           | Frameshift               |                   |
|                       | +7082                 | ins 'GAAA'         | Frameshift               |                   |
|                       | +7082                 | 'G'>'AA'           | Frameshift               |                   |
|                       | +7082                 | 'G'>'CC'           | Frameshift               | 2                 |
|                       | +7082                 | 'G'>'CCCCC'        | Frameshift               |                   |
|                       | +7082                 | ins 'CC'           | Frameshift               |                   |
|                       | +7082                 | ins 'CCCC'         | Frameshift               |                   |
|                       | +7082                 | 'G'>'CCCTCCGC'     | Frameshift               |                   |
|                       | +7082                 | 'G'>'TT'           | Frameshift               |                   |
|                       | +7082                 | ins 'CGCC'         | Frameshift               |                   |
|                       | +7083                 | ins 'CCCT'         | Frameshift               |                   |
|                       | +7084                 | ins 'G'            | Frameshift               |                   |
|                       | +7084                 | ins 'GGGG'         | Frameshift               |                   |
|                       | +7087                 | dup 29 bp          | Frameshift               |                   |
|                       | +7096                 | dup 43 bp          | Frameshift               |                   |
|                       | +7183                 | ins 'AGCGA'        | Frameshift               |                   |
|                       | +7185                 | ins 'T'            | Frameshift               |                   |
|                       | +7193                 | ins 8 bp           | Frameshift               |                   |
|                       | +7193                 | 'C'>'TT"           | Frameshift               |                   |
|                       | +7194                 | ins 'CGCC'         | Frameshift               |                   |
|                       | +7194                 | ins 'CCGC'         | Frameshift               |                   |
|                       | +7195                 | ins 'GGGG'         | Frameshift               |                   |
|                       | +7196                 | ins 'AAAG'         | Frameshift               |                   |
|                       | +7211                 | ins 'CC'           | Frameshift               |                   |
|                       | +7216                 | ins 'GAG'          | Frameshift               |                   |
|                       | +7228                 | ins 'GGGA'         | Frameshift               |                   |
|                       | +7259                 | C2>C4              | Frameshift               |                   |
|                       | +7259                 | ins 'C'            | Frameshift               |                   |
|                       | +7260                 | ins 'CCCC'         | Frameshift               |                   |
|                       | +7260                 | ins 'CCTC'         | Frameshift               |                   |
|                       | +7274                 | 'GTC'>'AGGGGTT'    | Frameshift               |                   |
|                       | +7294                 | ins 'T'            | Frameshift               |                   |
| +7343                 | 'T'>'GC'              | Frameshift         |                          |                   |
| +7377                 | ins 'C'               | Frameshift         |                          |                   |
| +7406                 | C4>C5                 | Frameshift         |                          |                   |
| +7407                 | ins 'A'               | Frameshift         |                          |                   |
| +7423                 | ins 'C'               | Frameshift         |                          |                   |
| +7446                 | ins 'CACC'            | Frameshift         |                          |                   |
| +7460                 | C5>C6                 | Frameshift         |                          |                   |
| +7463                 | C4>C5                 | Frameshift         |                          |                   |
| +7464                 | ins 'C'               | Frameshift         |                          |                   |

<sup>a</sup> Location relative to 'A' of translation start 'ATG' codon.
