# Supplementary material for: Genetic Analysis of T Cell Lymphomas in Carbon Ion-Irradiated Mice Reveals Frequent Interstitial Chromosome Deletions: Implications for Second Cancer Induction in Normal Tissues during Carbon Ion Radiotherapy
Source: PubMed Central journal article supplement (PMC4488329; doi:10.1371/journal.pone.0130666), 2015-06-30
Supplement: pone.0130666.s016.pdf [file pone.0130666.s016.pdf]

**S6 Table. Summary of *Notch1* HD Domain Sequence Mutations**

| <b>Mutation Class</b> | <b>Location <sup>a</sup></b> | <b>Alteration</b> | <b>Predicted Protein Change</b> | <b>No Tumours (if &gt;1)</b> |
|-----------------------|------------------------------|-------------------|---------------------------------|------------------------------|
| <b>Deletion</b>       | +4821-4829                   | del 9 bp          | del R1608-A1610                 |                              |
| <b>Insertion</b>      | +5142-5188                   | dup 48 bp         | dup H1725-G1741                 |                              |
|                       | +4814                        | ins 'GGT'         | V1605ins VV                     |                              |
|                       | +4999                        | ins 'CAACCT'      | V1666ins VST                    |                              |
| <b>Point-Mutation</b> | +4721                        | T>C               | L1574P                          |                              |
|                       | +5003                        | T>C               | L1668P                          | 11 <sup>b</sup>              |
|                       | +5009                        | T>G               | I1670S                          |                              |
|                       | +5092                        | T>C               | S1698P                          |                              |
|                       | +5096                        | T>C               | L1699P                          |                              |

<sup>a</sup> Location relative to 'A' of translation start 'ATG' codon.

<sup>b</sup> 8 tumours were C-TL, 3 were G-TL.
