# Supplementary material for: Genetic Analysis of T Cell Lymphomas in Carbon Ion-Irradiated Mice Reveals Frequent Interstitial Chromosome Deletions: Implications for Second Cancer Induction in Normal Tissues during Carbon Ion Radiotherapy
Source: PubMed Central journal article supplement (PMC4488329; doi:10.1371/journal.pone.0130666), 2015-06-30
Supplement: pone.0130666.s017.pdf [file pone.0130666.s017.pdf]

**S7 Table. Summary of *Ikzf1* Protein Coding Sequence Mutations**

| Mutation Class                        | Location <sup>a</sup> | Alteration                                                  | Predicted Protein Change | No Tumours (if>1) |
|---------------------------------------|-----------------------|-------------------------------------------------------------|--------------------------|-------------------|
| <b>Aberrantly Spliced Transcripts</b> |                       |                                                             |                          |                   |
|                                       |                       | del Exon 3-5                                                | Aberrant protein         |                   |
|                                       |                       | del Exon 3-6                                                | Aberrant protein         |                   |
|                                       |                       | del Exon 4                                                  | Aberrant protein         | 3                 |
|                                       |                       | del Exon 4-6                                                | Aberrant protein         | 2                 |
|                                       |                       | del Exon 5                                                  | Aberrant protein         |                   |
|                                       |                       | del Exon 5-6                                                | Aberrant protein         |                   |
| <b>Deletion</b>                       |                       |                                                             |                          |                   |
|                                       | +360                  | del 61 bp                                                   | Frameshift               |                   |
|                                       | +1053                 | del 'C'                                                     | Frameshift               |                   |
|                                       | +1253                 | 'ACGC'>'CCT'                                                | Frameshift               |                   |
|                                       | +1468                 | del 'AT'                                                    | Frameshift               |                   |
| <b>Insertion</b>                      |                       |                                                             |                          |                   |
|                                       | Exon 1-2              | del 17 bp from end of Exon 1, ins 150 bp upstream of Exon 2 | Frameshift               |                   |
|                                       | Exon 2                | 'GT'>'TA' end of Exon 2, ins 74 bp downstream of Exon 2     | Frameshift               |                   |
|                                       | Exon 5-6              | ins 113 bp between Exon 5 and Exon 6 to form novel Exon     | Frameshift               |                   |
|                                       | +56                   | C6>C7                                                       | Frameshift               | 2                 |
|                                       | +141                  | C2>C7                                                       | Frameshift               |                   |
|                                       | +512                  | A2>A3                                                       | Frameshift               |                   |
|                                       | +764                  | ins 'C'                                                     | Frameshift               |                   |
|                                       | +810                  | ins 'G'                                                     | Frameshift               |                   |
|                                       | +825                  | ins 'CT'                                                    | Frameshift               |                   |
|                                       | +996                  | C6>C7                                                       | Frameshift               |                   |
|                                       | +1054                 | C6>C7                                                       | Frameshift               |                   |
|                                       | +1067                 | C6>C7                                                       | Frameshift               | 2                 |
|                                       | +1140                 | G2>G9                                                       | Frameshift               |                   |
|                                       | +1232                 | ins 'GTGT'                                                  | Frameshift               |                   |
|                                       | +1286                 | 'GC'>'GGG'                                                  | Frameshift               |                   |
| <b>Point-Mutation</b>                 |                       |                                                             |                          |                   |
|                                       | +151                  | C>T                                                         | R51*                     |                   |
|                                       | +431                  | C>T                                                         | P144L                    |                   |
|                                       | +446                  | A>C                                                         | Q149P                    |                   |
|                                       | +484                  | C>T                                                         | R162W                    |                   |
|                                       | +485                  | G>C                                                         | R162P                    |                   |
|                                       | +485                  | G>A                                                         | R162Q                    |                   |
|                                       | +488                  | A>G                                                         | H163R                    |                   |
|                                       | +488                  | A>C                                                         | H163P                    |                   |
|                                       | +505                  | G>T                                                         | G169C                    |                   |
|                                       | +518                  | T>C                                                         | F173C                    |                   |
|                                       | +532                  | T>G                                                         | C178G                    |                   |
|                                       | +539                  | A>G                                                         | Y180C                    | 2                 |
|                                       | +544                  | T>C                                                         | C182R                    | 2                 |
|                                       | +557                  | A>C                                                         | D186A                    | 2                 |
|                                       | +575                  | T>C                                                         | L192P                    |                   |
|                                       | +589                  | G>A                                                         | R184Q                    |                   |
|                                       | +637                  | C>T                                                         | R213*                    |                   |
|                                       | +702                  | C>T                                                         | R222*                    |                   |

<sup>a</sup> Location relative to 'A' of translation start 'ATG' codon.
