# Supplementary material for: Genetic Analysis of T Cell Lymphomas in Carbon Ion-Irradiated Mice Reveals Frequent Interstitial Chromosome Deletions: Implications for Second Cancer Induction in Normal Tissues during Carbon Ion Radiotherapy
Source: PubMed Central journal article supplement (PMC4488329; doi:10.1371/journal.pone.0130666), 2015-06-30
Supplement: pone.0130666.s018.pdf [file pone.0130666.s018.pdf]

**S8 Table. Summary of *Trp53* Protein Coding Sequence Mutations**

| <b>Mutation Class</b> | <b>Location <sup>a</sup></b> | <b>Alteration</b> | <b>Predicted Protein Change</b> | <b>No Tumours (if &gt;1)</b> |
|-----------------------|------------------------------|-------------------|---------------------------------|------------------------------|
| <b>Deletion</b>       | Exon 2 – 4                   | del Exon 2 – 4    | Aberrant protein                |                              |
| <b>Insertion</b>      | +726                         | ins 'GC'          | Frameshift                      |                              |
| <b>Point-Mutation</b> | +329                         | T>G               | F110C                           |                              |
|                       | +404                         | C>T               | A135V                           | 3                            |
|                       | +508                         | G>A               | V170M                           |                              |
|                       | +578                         | G>C               | R193P                           |                              |
|                       | +628                         | C>T               | R210C                           |                              |
|                       | +632                         | A>G               | H211R                           |                              |
|                       | +638                         | T>G               | V213G                           |                              |
|                       | +692                         | A>G               | Y231C                           |                              |
|                       | +722                         | G>A               | G241E                           |                              |
|                       | +801                         | T>G               | F267L                           |                              |
|                       | +808                         | C>T               | R270C                           |                              |

<sup>a</sup> Location relative to 'A' of translation start 'ATG' codon.
