# Supplementary material for: Genetic Analysis of T Cell Lymphomas in Carbon Ion-Irradiated Mice Reveals Frequent Interstitial Chromosome Deletions: Implications for Second Cancer Induction in Normal Tissues during Carbon Ion Radiotherapy
Source: PubMed Central journal article supplement (PMC4488329; doi:10.1371/journal.pone.0130666), 2015-06-30
Supplement: pone.0130666.s019.pdf [file pone.0130666.s019.pdf]

**S9 Table. Summary of *Pten* Protein Coding Sequence Mutations**

| Mutation Class                        | Location <sup>a</sup> | Alteration     | Predicted Protein Change | No Tumours (if>1) |
|---------------------------------------|-----------------------|----------------|--------------------------|-------------------|
| <b>Aberrantly Spliced Transcripts</b> |                       | del Exon 2     | Aberrant protein         | 2                 |
|                                       |                       | del Exon 2-8   | Aberrant protein         |                   |
|                                       |                       | del Exon 2-9   | Aberrant protein         |                   |
|                                       |                       | del Exon 3-5   | Aberrant protein         |                   |
|                                       |                       | del Exon 4     | Aberrant protein         |                   |
|                                       |                       | del Exon 4 & 5 | Aberrant protein         |                   |
|                                       |                       | del Exon 5     | Aberrant protein         |                   |
|                                       |                       | del Exon 7     | Aberrant protein         |                   |
|                                       |                       | del Exon 7-8   | Aberrant protein         |                   |
|                                       |                       | del Exon 8     | Aberrant protein         |                   |
| <b>Deletion</b>                       | +261-338              | del 77 bp      | Frameshift               |                   |
|                                       | +968                  | del AA ins T   | Frameshift               |                   |
|                                       | +968                  | del 'A'        | Frameshift               |                   |
|                                       | +332-491              | del 161 bp     | Frameshift               |                   |
| <b>Insertion</b>                      | +13                   | ins 'T'        | Frameshift               | 4                 |
|                                       | +106                  | ins 'T'        | Frameshift               |                   |
|                                       | +170                  | T5>T6          | Frameshift               |                   |
|                                       | +312                  | ins 'CTTC'     | Frameshift               |                   |
|                                       | +546                  | A6>A7          | Frameshift               |                   |
|                                       | +720                  | 'T'>'TTATGG'   | Frameshift               |                   |
|                                       | +938                  | A2>A3          | Frameshift               |                   |
|                                       | +963                  | A6>A7          | Frameshift               |                   |
|                                       | +988                  | ins 'GGGTG'    | Frameshift               |                   |
|                                       | +989                  | ins 'C'        | Frameshift               |                   |
|                                       | +1029                 | dup (8 bp)     | Frameshift               |                   |
| <b>Point-Mutation</b>                 | +95                   | T>G            | I32S                     |                   |
|                                       | +146                  | A>T            | N49I                     |                   |
|                                       | +277                  | C>T            | H93Y                     |                   |
|                                       | +372                  | T>G            | C124W                    |                   |
|                                       | +389                  | G>A            | R130Q                    |                   |
|                                       | +391                  | A>C            | T131P                    |                   |
|                                       | +398                  | T>G            | V133G                    |                   |
|                                       | +419                  | T>A            | L140*                    |                   |
|                                       | +476                  | G>C            | R159T                    |                   |
|                                       | +512                  | A>G            | Q171R                    |                   |
|                                       | +517                  | C>T            | R173C                    |                   |
|                                       | +542                  | T>C            | L181P                    |                   |
|                                       | +796                  | A>T            | K266*                    |                   |
|                                       | +830                  | C>T            | T277M                    |                   |
|                                       | +974                  | T>G            | L325R                    |                   |
|                                       | +1003                 | C>T            | R335*                    |                   |

<sup>a</sup> Location relative to 'A' of translation start 'ATG' codon.
